# Supplementary material for: Community acquired pneumonia incidence before and after proton pump inhibitor prescription: population based study
Source: PubMed Central journal article supplement — BMJ. 2016 Nov 15;355:i5813. doi: 10.1136/bmj.i5813 (PMC5110150; doi:10.1136/bmj.i5813), 2016-11-15
Supplement: othf033912.ww1_default.pdf [file othf033912.ww1_default.pdf]

**Supplement Table A:** Sensitivity analysis: self-controlled case-series analysis restricted to the first event of pneumonia during the observation period. (Age adjusted incidence rate ratio and 95% confidence intervals).

| Period                                                          | Broad primary care definition of pneumonia<br>(n=48,451) |              |                    | Pneumonia definition<br>Narrow primary care definition of pneumonia<br>(n=4,461) |              |                    | Hospital and mortality records based definition<br>(in HES-ONS linked patients)<br>(n=5,582) |              |                    |
|-----------------------------------------------------------------|----------------------------------------------------------|--------------|--------------------|----------------------------------------------------------------------------------|--------------|--------------------|----------------------------------------------------------------------------------------------|--------------|--------------------|
|                                                                 | No of events                                             | Person years | IRR(95%CI)         | No of events                                                                     | Person years | IRR(95%CI)         | No of events                                                                                 | Person years | IRR(95%CI)         |
| Baseline unexposed period                                       | 40,236                                                   | 550492       | 1.0                | 2880                                                                             | 46780.9      | 1.0                | 3840                                                                                         | 43714.2      | 1.0                |
| Pre-exposed<br>(30 days before first PPI prescription)          | 1257                                                     | 9550.72      | 1.70(1.60 to 1.80) | 199                                                                              | 825.791      | 3.69(3.18 to 4.28) | 323                                                                                          | 886.324      | 3.71(3.30 to 4.17) |
| 30 days exposer period<br>(30 day after first PPI prescription) | 722                                                      | 9514.02      | 0.98(0.91 to 1.05) | 132                                                                              | 822.658      | 2.46(2.06 to 2.94) | 222                                                                                          | 881.281      | 2.57(2.24 to 2.95) |
| The remaining exposure period                                   | 6236                                                     | 88291.2      | 1.00(0.97 to 1.04) | 1250                                                                             | 9467.21      | 2.98(2.73 to 3.26) | 1197                                                                                         | 9264.62      | 1.62(1.49 to 1.75) |

Note: All comparisons to baseline pneumonia incidence rate in unexposed periods  
HES=Hospital Episode Statistics; IRR=incidence rate ratio; ONS=Office for National Statistics

**Supplement Table B:** Sensitivity analysis: self-controlled case-series analysis after excluding cases with previous hospitalization.(Age adjusted incidence rate ratio and 95% confidence intervals).

| Period                                                          | Pneumonia definition                       |              |                    |                                             |              |                    |
|-----------------------------------------------------------------|--------------------------------------------|--------------|--------------------|---------------------------------------------|--------------|--------------------|
|                                                                 | Broad primary care definition of pneumonia |              |                    | Narrow primary care definition of pneumonia |              |                    |
|                                                                 | (n=34,122)                                 |              |                    | (n=2,682)                                   |              |                    |
|                                                                 | No of events                               | Person years | IRR(95%CI)         | No of events                                | Person years | IRR(95%CI)         |
| Baseline unexposed period                                       | 44,943                                     | 319090       | 1.0                | 1,734                                       | 23956.3      | 1.0                |
| Pre-exposed<br>(30 days before first PPI prescription)          | 1,722                                      | 6034.81      | 1.85(1.76 to 1.94) | 73                                          | 470.322      | 1.96(1.54 to 2.49) |
| 30 days exposer period<br>(30 day after first PPI prescription) | 1,066                                      | 5998.49      | 1.15(1.08 to 1.22) | 73                                          | 467.762      | 1.98(1.56 to 2.52) |
| The remaining exposure period                                   | 9,101                                      | 45147.2      | 1.42(1.38 to 1.47) | 641                                         | 4362.37      | 2.57(2.28 to 2.91) |

Note: All comparisons to baseline pneumonia incidence rate in unexposed periods  
IRR, incidence rate ratio ;CI, confidence interval

**Supplement Table C:** Sensitivity analysis: self-controlled case-series analysis excluding patients who died within 90 days of the date of pneumonia diagnosis. (Age adjusted incidence rate ratio and 95% confidence intervals) .

| Period                                                       | Pneumonia definition                       |              |                    |                                             |              |                    |                                                                              |              |                    |
|--------------------------------------------------------------|--------------------------------------------|--------------|--------------------|---------------------------------------------|--------------|--------------------|------------------------------------------------------------------------------|--------------|--------------------|
|                                                              | Broad primary care definition of pneumonia |              |                    | Narrow primary care definition of pneumonia |              |                    | hospital and mortality records based definition (in HES-ONS linked patients) |              |                    |
|                                                              | (n=46,496)                                 |              |                    | (n=3,554)                                   |              |                    | (n=3,870)                                                                    |              |                    |
|                                                              | No of events                               | Person years | IRR(95%CI)         | No of events                                | Person years | IRR(95%CI)         | No of events                                                                 | Person years | IRR(95%CI)         |
| Baseline unexposed period                                    | 71,348                                     | 515040       | 1.0                | 2,633                                       | 38370.3      | 1.0                | 4,485                                                                        | 30278.6      | 1.0                |
| Pre-exposed (30 days before first PPI prescription)          | 2,539                                      | 8827.25      | 1.86(1.79 to 1.94) | 194                                         | 661.005      | 3.96(3.40 to 4.60) | 350                                                                          | 612.526      | 3.57(3.19 to 4.00) |
| 30 days exposer period (30 day after first PPI prescription) | 1,490                                      | 8803.66      | 1.09(1.04 to 1.15) | 102                                         | 656.287      | 2.11(1.72 to 2.58) | 224                                                                          | 606.556      | 2.32(2.02 to 2.66) |
| The remaining exposure period                                | 16,023                                     | 80970.8      | 1.39(1.35 to 1.42) | 936                                         | 7809.01      | 2.05(1.86 to 2.26) | 1,561                                                                        | 6735.69      | 1.71(1.59 to 1.84) |

Note: All comparisons to baseline pneumonia incidence rate in unexposed periods  
HES=Hospital Episode **Statistics**; IRR=incidence rate ratio; ONS=Office for National Statistics

**Supplement Table D:** Sensitivity analysis: PERR analysis after excluding cases with previous hospitalization, according to the 3 different definitions of community-acquired pneumonia

| Parameter                                                 | Pneumonia definition                                  |                           |                                                        |                        |
|-----------------------------------------------------------|-------------------------------------------------------|---------------------------|--------------------------------------------------------|------------------------|
|                                                           | Broad primary care definition of pneumonia<br>265,650 |                           | Narrow primary care definition of pneumonia<br>265,650 |                        |
|                                                           | unexposed                                             | Exposed                   | unexposed                                              | exposed                |
| Before prescription                                       |                                                       |                           |                                                        |                        |
| Pneumonia events                                          | 3,353(2.5)                                            | 7,300(5.5)                | 126(0.1)                                               | 321(0.2)               |
| Incidence of pneumonia per 1,000 per person years (95%CI) | 25.57<br>(24.72 to 26.45)                             | 56.49<br>(55.21 to 57.80) | 1.10<br>(0.79 to 1.13)                                 | 2.41<br>(2.16 to 2.69) |
| Hazard ratio(PPI/non-PP) (95%CI)                          | 2.20<br>(2.11 to 2.29)                                |                           | 2.54<br>(2.07 to 3.13)                                 |                        |
| After prescription                                        |                                                       |                           |                                                        |                        |
| Pneumonia events                                          | 3,518(2.6)                                            | 6,603(4.9)                | 222 (0.1)                                              | 428 (0.3)              |
| Incidence of pneumonia per 1,000 per person years (95%CI) | 26.86<br>(25.99 to 27.76)                             | 51.09<br>(49.87 to 52.34) | 1.78<br>(1.56 to 2.03)                                 | 3.50<br>(3.18 to 3.85) |
| Hazard ratio(PPI/non-PP) (95%CI)                          | 1.91<br>(1.82 to 1.98)                                |                           | 2.15<br>(1.82 to 2.55)                                 |                        |
| <b>Prior event rate ratio(PERR)*</b>                      | <b>0.86</b><br><b>( 0.74-0.97)</b>                    |                           | <b>0.84</b><br><b>(0.65-1.16)</b>                      |                        |

\*PERR= Hazard ratio for pneumonia between exposed and unexposed after proton pump inhibitor prescription divided by the hazard ratio for pneumonia before proton pump inhibitor prescription. CI, confidence interval

**Supplement Table E:** Sensitivity analysis: PERR analysis after excluding patients who died within 90 days of the date of pneumonia diagnosis, according to the 3 different definitions of community-acquired pneumonia

| Parameter                                                 | Pneumonia definition                       |                           |                                             |                        |                                                                              |                           |
|-----------------------------------------------------------|--------------------------------------------|---------------------------|---------------------------------------------|------------------------|------------------------------------------------------------------------------|---------------------------|
|                                                           | Broad primary care definition of pneumonia |                           | Narrow primary care definition of pneumonia |                        | Hospital and mortality records based definition (in HES-ONS linked patients) |                           |
|                                                           | 249,816                                    |                           | 249,860                                     |                        | 195,770                                                                      |                           |
|                                                           | unexposed                                  | exposed                   | unexposed                                   | exposed                | Unexposed                                                                    | exposed                   |
| Before prescription                                       |                                            |                           |                                             |                        |                                                                              |                           |
| Pneumonia events                                          | 3,217(2.5)                                 | 7,190(5.7)                | 132(0.1)                                    | 396(0.3)               | 327(0.3)                                                                     | 1,070(1.09)               |
| Incidence of pneumonia per 1,000 per person years (95%CI) | 26.10<br>(25.21 to 27.02)                  | 59.23<br>(57.88 to 60.62) | 1.05<br>(0.89 to 1.25)                      | 3.17<br>(2.87 to 3.50) | 3.34<br>(3.00 to 3.72)                                                       | 10.97<br>(10.33 to 11.65) |
| Hazard ratio(PPI/non-PP) (95%CI)                          | 2.26<br>(2.17 to 2.36)                     |                           | 3.00<br>(2.46 to 3.65)                      |                        | 3.25<br>(2.87 to 3.68)                                                       |                           |
| After prescription                                        |                                            |                           |                                             |                        |                                                                              |                           |
| Pneumonia events                                          | 3,461(2.7)                                 | 6,870(5.5)                | 141 (0.1)                                   | 343 (0.2)              | 362(0.3)                                                                     | 910(0.9)                  |
| Incidence of pneumonia per 1,000 per person years (95%CI) | 28.11<br>(27.18 to 29.06)                  | 56.63<br>(55.30 to 57.98) | 1.12<br>(0.95 to 1.33)                      | 2.74<br>(2.46 to 3.05) | 3.70<br>(3.34 to 4.10)                                                       | 9.34<br>(8.75 to 9.96)    |
| Hazard ratio(PPI/non-PP) (95%CI)                          | 2.01<br>(1.93 to 2.10)                     |                           | 2.45<br>(2.01 to 2.98)                      |                        | 2.54<br>(2.25 to 2.88)                                                       |                           |
| <b>Prior event rate ratio(PERR)*</b>                      | <b>0.88<br/>(0.79 to 0.97)</b>             |                           | <b>0.81<br/>(0.62 to 1.00)</b>              |                        | <b>0.78<br/>(0.60 to 1.01)</b>                                               |                           |

\*PERR= Hazard ratio for pneumonia between exposed and unexposed after proton pump inhibitor prescription divided by the hazard ratio for pneumonia before proton pump inhibitor prescription. HES, Hospital Episode Statistics data ; ONS, the Office for National Statistics mortality data; CI, confidence interval

**Supplement Table F:** Sensitivity analysis: PERR analysis restricted to those over the age of 65 years, according to the 3 different definitions of community-acquired pneumonia.

| Parameter                                                 | Pneumonia definition                       |                          |                                             |                           |                                                                                 |                           |
|-----------------------------------------------------------|--------------------------------------------|--------------------------|---------------------------------------------|---------------------------|---------------------------------------------------------------------------------|---------------------------|
|                                                           | Broad primary care definition of pneumonia |                          | Narrow primary care definition of pneumonia |                           | hospital and mortality records based definition<br>(in HES-ONS linked patients) |                           |
|                                                           | 99,294                                     |                          | 99,294                                      |                           | 81,556                                                                          |                           |
|                                                           | unexposed                                  | exposed                  | unexposed                                   | exposed                   | unexposed                                                                       | exposed                   |
| Before prescription                                       |                                            |                          |                                             |                           |                                                                                 |                           |
| Pneumonia events                                          | 2,003 (4.03)                               | 4,082 (8.22)             | 89(0.20)                                    | 358 (0.72)                | 116(0.28)                                                                       | 442(1.08)                 |
| Incidence of pneumonia per 1,000 per person years (95%CI) | 41.22<br>(39.46-43.07)                     | 85.57<br>(82.99-88.24)   | 1.97<br>(1.62-2.40)                         | 7.22<br>(6.51-8.01)       | 2.84<br>(2.37-3.41)                                                             | 10.87<br>(9.90-11.93)     |
| Hazard ratio(PPI/non-PP) (95%CI)                          | 2.07<br>(1.98-2.19)                        |                          | 3.66<br>(2.92-4.57)                         |                           | 3.82<br>(3.11-4.69)                                                             |                           |
| After prescription                                        |                                            |                          |                                             |                           |                                                                                 |                           |
| Pneumonia events                                          | 2,204 (4.44)                               | 3,816 (7.69)             | 212 (0.43)                                  | 482 (0.97)                | 267 (0.65)                                                                      | 678 (1.66)                |
| Incidence of pneumonia per 1,000 per person years (95%CI) | 48.05<br>(46.09 to 50.10)                  | 90.98<br>(88.14 to 93.9) | 4.52<br>(3.95 to 5.17)                      | 11.06<br>(10.12 to 12.10) | 7.04<br>(6.24 to 7.93)                                                          | 19.31<br>(17.91 to 20.82) |
| Hazard ratio(PPI/non-PP) (95%CI)                          | 1.88<br>(1.78 to 1.98)                     |                          | 2.43<br>(2.07 to 2.86)                      |                           | 2.72<br>(2.36 to 3.14)                                                          |                           |
| <b>Prior event rate ratio(PERR)*</b>                      | <b>0.90</b><br><b>(0.83 to 1.01)</b>       |                          | <b>0.66</b><br><b>(0.46 to 1.60)</b>        |                           | <b>0.71</b><br><b>(0.3 to 1.11)</b>                                             |                           |

\*PERR= Hazard ratio for pneumonia between exposed and unexposed after proton pump inhibitor prescription divided by the hazard ratio for pneumonia before proton pump inhibitor prescription. HES, Hospital Episode Statistics data ; ONS, the Office for National Statistics mortality data; CI, confidence interval

**Supplement Table G:** Sensitivity analysis: PERR analysis restricted to the time period prior to the availability of OTC PPIs, according to the 3 different definitions of community-acquired pneumonia.

| Parameter                                                 | Pneumonia definition                       |                           |                                             |                        |                                                                              |                           |
|-----------------------------------------------------------|--------------------------------------------|---------------------------|---------------------------------------------|------------------------|------------------------------------------------------------------------------|---------------------------|
|                                                           | Broad primary care definition of pneumonia |                           | Narrow primary care definition of pneumonia |                        | hospital and mortality records based definition (in HES-ONS linked patients) |                           |
|                                                           | 45,146                                     |                           | 45,146                                      |                        | 27,704                                                                       |                           |
|                                                           | unexposed                                  | exposed                   | unexposed                                   | exposed                | unexposed                                                                    | exposed                   |
| Before prescription                                       |                                            |                           |                                             |                        |                                                                              |                           |
| Pneumonia events                                          | 721(3.1)                                   | 1,366(6.0)                | 33(0.1)                                     | 87(0.3)                | 70(0.5)                                                                      | 293(2.1)                  |
| Incidence of pneumonia per 1,000 per person years (95%CI) | 28.32<br>(26.19 to 30.62)                  | 66.17<br>(62.85 to 69.67) | 1.46<br>(1.04 to 2.05)                      | 3.86<br>(3.12 to 4.76) | 5.06<br>(4.00 to 6.40)                                                       | 21.31<br>(19.00 to 23.89) |
| Hazard ratio(PPI/non-PP) (95%CI)                          | 2.34<br>(2.13-2.58)                        |                           | 2.63<br>(1.76-3.93)                         |                        | 4.12<br>(3.17 to 5.36)                                                       |                           |
| After prescription                                        |                                            |                           |                                             |                        |                                                                              |                           |
| Pneumonia events                                          | 721 (3.19)                                 | 1,366 (6.05)              | 62 (0.27)                                   | 119 (0.53)             | 124 (0.9)                                                                    | 238 (1.7)                 |
| Incidence of pneumonia per 1,000 per person years (95%CI) | 33.23<br>(30.89 to 35.75)                  | 65.89<br>(62.49 to 69.48) | 2.81<br>(2.19 to 3.60)                      | 5.56<br>(4.65 to 6.66) | 9.20<br>(7.72 to 10.97)                                                      | 18.37<br>(16.18 to 20.86) |
| Hazard ratio(PPI/non-PP) (95%CI)                          | 2.02<br>(1.84 to 2.22)                     |                           | 2.53<br>(1.80 to 3.54)                      |                        | 2.09<br>(1.66 to 2.62)                                                       |                           |
| <b>Prior event rate ratio(PERR)*</b>                      | 0.86<br>(0.77 to 0.95)                     |                           | 0.96<br>(0.75 to 1.17)                      |                        | 0.50<br>(0.44 to 0.82)                                                       |                           |

\*PERR= Hazard ratio for pneumonia between exposed and unexposed after proton pump inhibitor prescription divided by the hazard ratio for pneumonia before proton pump inhibitor prescription. HES, Hospital Episode Statistics data ; ONS, the Office for National Statistics mortality data; CI, confidence interval

**Supplement Table H:** Sensitivity analysis: PERR analysis restricted to cases before the first large population-based study was published according to the 3 different definitions of community-acquired pneumonia.

| Parameter                                                 | Pneumonia definition                       |                           |                                             |                        |                                                                              |                           |
|-----------------------------------------------------------|--------------------------------------------|---------------------------|---------------------------------------------|------------------------|------------------------------------------------------------------------------|---------------------------|
|                                                           | Broad primary care definition of pneumonia |                           | Narrow primary care definition of pneumonia |                        | hospital and mortality records based definition (in HES-ONS linked patients) |                           |
|                                                           | 77,972                                     |                           | 77,972                                      |                        | 57,982                                                                       |                           |
|                                                           | unexposed                                  | exposed                   | unexposed                                   | exposed                | unexposed                                                                    | exposed                   |
| Before prescription                                       |                                            |                           |                                             |                        |                                                                              |                           |
| Pneumonia events                                          | 1,034(2.6)                                 | 2,465(6.3)                | 57(0.1)                                     | 166(0.4)               | 171(0.5)                                                                     | 649(2.2)                  |
| Incidence of pneumonia per 1,000 per person years (95%CI) | 26.88<br>(25.29 to 28.57)                  | 65.27<br>(62.74 to 67.90) | 1.46<br>(1.12 to 1.89)                      | 4.26<br>(3.66 to 4.96) | 5.91<br>(5.09 to 6.87)                                                       | 22.57<br>(20.89 to 24.37) |
| Hazard ratio(PPI/non-PP) (95%CI)                          | 2.43<br>(2.26 to 2.62)                     |                           | 2.91<br>(2.15-3.93)                         |                        | 3.78<br>(3.19 to 4.47)                                                       |                           |
| After prescription                                        |                                            |                           |                                             |                        |                                                                              |                           |
| Pneumonia events                                          | 1,208(3.1)                                 | 2,383(6.1)                | 97(0.27)                                    | 211 (0.54)             | 253 (0.8)                                                                    | 503 (1.7)                 |
| Incidence of pneumonia per 1,000 per person years (95%CI) | 32.28<br>(30.51 to 26.45)                  | 66.84<br>(64.21 to 69.58) | 2.55<br>(2.09 to 3.11)                      | 5.74<br>(5.01 to 6.56) | 8.99<br>(7.95 to 10.17)                                                      | 18.59<br>(17.03 to 20.29) |
| Hazard ratio(PPI/non-PP) (95%CI)                          | 2.13<br>(1.98 to 2.29)                     |                           | 2.68<br>(2.06 to 3.49)                      |                        | 2.25<br>(1.92 to 2.64)                                                       |                           |
| <b>Prior event rate ratio(PERR)*</b>                      | 0.87<br>(0.86 to 0.98)                     |                           | 0.92<br>(0.59 to 1.13)                      |                        | 0.59<br>(0.48 to 0.95)                                                       |                           |

\*PERR= Hazard ratio for pneumonia between exposed and unexposed after proton pump inhibitor prescription divided by the hazard ratio for pneumonia before proton pump inhibitor prescription. HES, Hospital Episode Statistics data ; ONS, the Office for National Statistics mortality data; CI, confidence interval



**Supplement Table I:** Sensitivity analysis: adjusted and unadjusted hazard ratios and 95% confidence intervals (95% CI) for the association of community-acquired pneumonia with proton pump inhibitors (PPI) according to the 3 different definitions of community-acquired pneumonia; restricted to those over the age of 65 years.

| Parameter                                       | Pneumonia definition                       |                            |                                             |                           |                                                                              |                           |
|-------------------------------------------------|--------------------------------------------|----------------------------|---------------------------------------------|---------------------------|------------------------------------------------------------------------------|---------------------------|
|                                                 | Broad primary care definition of pneumonia |                            | Narrow primary care definition of pneumonia |                           | hospital and mortality records based definition (in HES-ONS linked patients) |                           |
|                                                 | 99,294                                     |                            | 99,294                                      |                           | 80,974                                                                       |                           |
|                                                 | unexposed                                  | exposed                    | unexposed                                   | exposed                   | unexposed                                                                    | exposed                   |
| Number of pneumonia events                      | 902(1.8)                                   | 2,047(4.1)                 | 53(0.1)                                     | 281(0.5)                  | 212(0.52)                                                                    | 885(2.1)                  |
| Rate of pneumonia per 1,000 person years(95%CI) | 21.63<br>(39.05 to 44.49)                  | 99.25<br>(95.04 to 103.64) | 2.35<br>(1.79 to 3.08)                      | 12.50<br>(11.12 to 14.05) | 11.70<br>(10.23 to 13.39)                                                    | 49.59<br>(46.43 to 52.97) |
| Unadjusted Hazard ratio (95%CI)                 | 2.35<br>(2.16 to 2.54)                     |                            | 5.50<br>(4.08 to 7.42)                      |                           | 4.27<br>(3.67 to 4.97)                                                       |                           |
| Adjusted hazard <sup>a</sup> (95%CI)            | 1.61<br>( 1.47 to 1.77)                    |                            | 4.02<br>(2.78 to 5.82)                      |                           | 3.27<br>(2.77 to 3.86)                                                       |                           |

HES, Hospital Episode Statistics data ; ONS, the Office for National Statistics mortality data; CI, confidence interval

<sup>a</sup> Adjusted model for the confounders that changed the multivariate Cox model by more than 10%: comorbidity index, number of GP visits, corticosteroid use, and immunosuppression

**Supplement Table J:** Sensitivity analysis: adjusted and unadjusted hazard ratios and 95% confidence intervals (95% CI) for the association of community-acquired pneumonia with proton pump inhibitors (PPI) according to the 3 different definitions of community-acquired pneumonia; restricted to the time period prior to the availability of OTC PPIs.

| Parameter                                        | Pneumonia definition                       |                           |                                             |                        |                                                                              |                           |
|--------------------------------------------------|--------------------------------------------|---------------------------|---------------------------------------------|------------------------|------------------------------------------------------------------------------|---------------------------|
|                                                  | Broad primary care definition of pneumonia |                           | Narrow primary care definition of pneumonia |                        | hospital and mortality records based definition (in HES-ONS linked patients) |                           |
|                                                  | unexposed                                  | exposed                   | unexposed                                   | exposed                | unexposed                                                                    | exposed                   |
| Number of pneumonia events                       | 280                                        | 640                       | 12(0.1)                                     | 71(0.3)                | 39(0.2)                                                                      | 140(1.0)                  |
| Rate of pneumonia per 1,000 person years (95%CI) | 31.06<br>(27.62 to 34.92)                  | 75.23<br>(69.62 to 81.29) | 1.28<br>(0.72 to 2.26)                      | 7.61<br>(6.03 to 9.61) | 6.68<br>(4.88 to 9.15)                                                       | 24.22<br>(20.52 to 28.58) |
| Unadjusted Hazard ratio (95%CI)                  | 2.41<br>(2.08 to 2.79)                     |                           | 5.91<br>(3.20 to 10.90)                     |                        | 3.63<br>(2.53 to 5.20)                                                       |                           |
| Adjusted hazard a (95%CI)                        | 1.39<br>(1.16 to 1.67)                     |                           | 4.72<br>(1.66 to 13.39)                     |                        | 3.26<br>(2.13 to 5.01)                                                       |                           |

CI, confidence interval

<sup>a</sup> Adjusted model for the confounders that changed the multivariate Cox model by more than 10%: comorbidity index, number of GP visits, corticosteroid use, and immunosuppression.
